# Supplementary material for: Effects of surface oxygen vacancy on CO2 adsorption and its activation towards C2H4 using metal (Cu, Pd, CuPd) cluster-loaded TiO2 catalysts: a first principles study
Source: Royal Society of Chemistry journal article supplement (doi:10.1039/d4cp03507k), 2024-01-01
Supplement: d4cp03507k1.pdf [file d4cp03507k1.pdf]

## Effects of surface oxygen vacancy on CO<sub>2</sub> adsorption and its activation towards C<sub>2</sub>H<sub>4</sub> using metal (Cu, Pd, CuPd) cluster-loaded TiO<sub>2</sub> catalysts: A first principles study

Sajjad Hussain, Lina Zhang, Zhengzheng Xie\*, Jianjun Yang, Qiuye Li\*

National & Local Joint Engineering Research Center for Applied Technology of Hybrid Nanomaterials, Henan University, Kaifeng 475004, China

\*To whom correspondence should be addressed. E-mail: xiezz@henu.edu.cn;

qiuyeli@henu.edu.cn

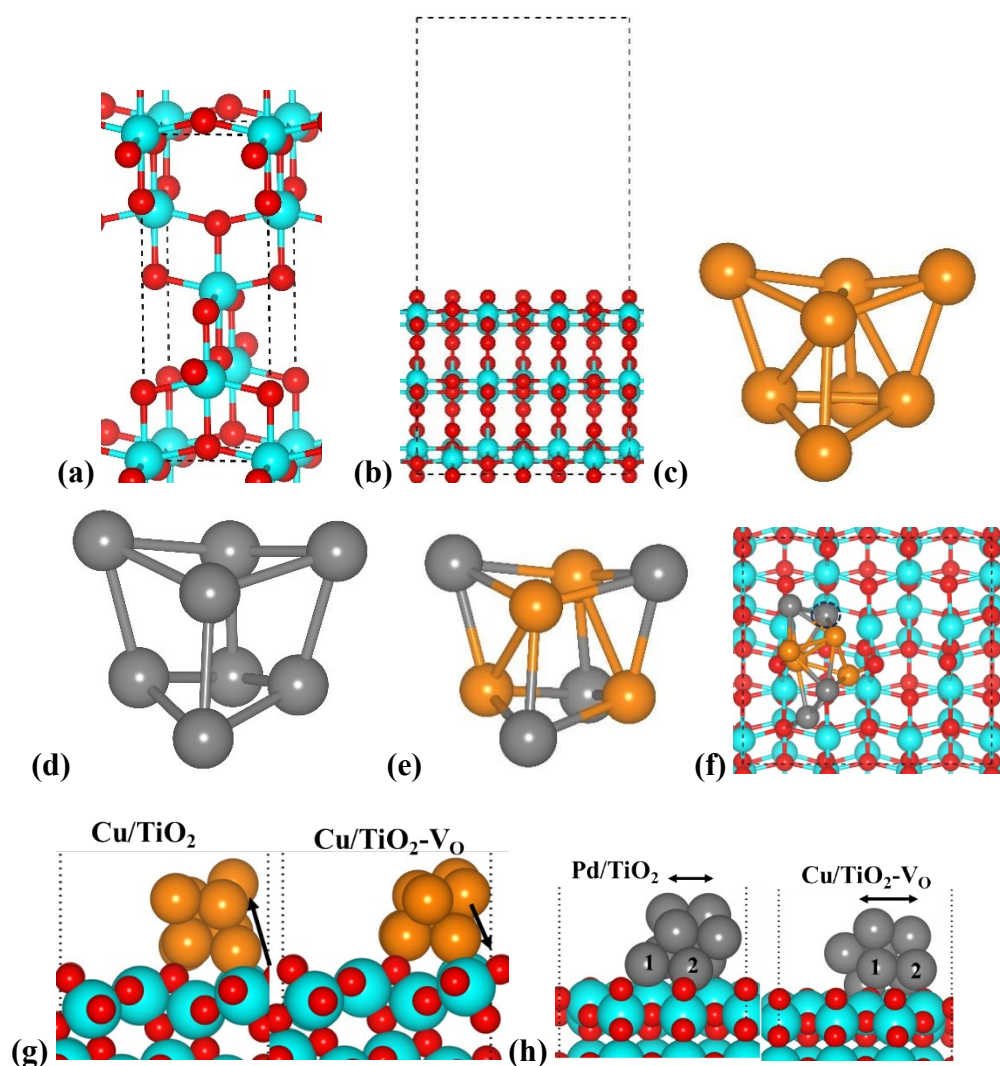

**Fig. S1:** The optimized geometries of (a) TiO<sub>2</sub> (b) clean TiO<sub>2</sub>(101) facet (c) Cu<sub>8</sub> (d) Pd<sub>8</sub> (e) Cu<sub>4</sub>Pd<sub>4</sub>

(f) CuPd/TiO<sub>2</sub>-V<sub>O</sub>, where one Pd occupies the V<sub>O</sub>, (g) Cu/TiO<sub>2</sub> with and without oxygen vacancy and (h) Pd/TiO<sub>2</sub> with and without oxygen vacancy. The cyan, red, orange and gray represent Ti, O, Cu and Pd, respectively.

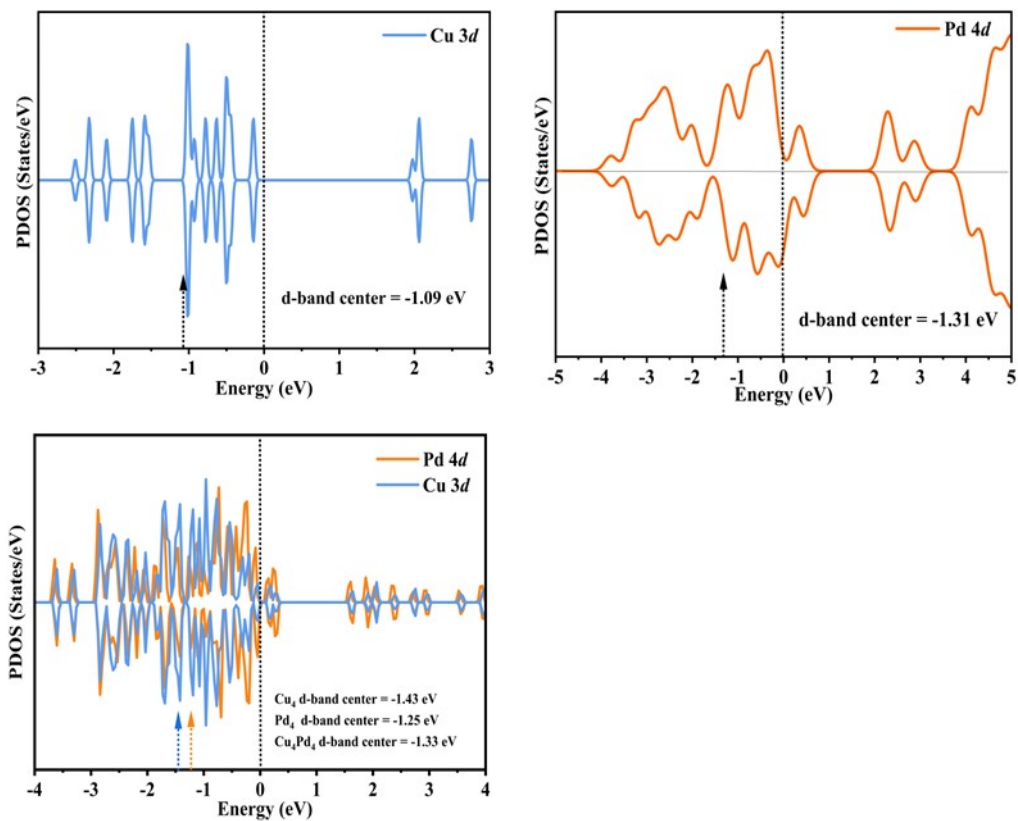

**Fig. S2:** The d-orbitals over (a) Cu<sub>8</sub> (b) Pd<sub>8</sub>/ and (c) Cu<sub>4</sub>Pd<sub>4</sub> clusters.

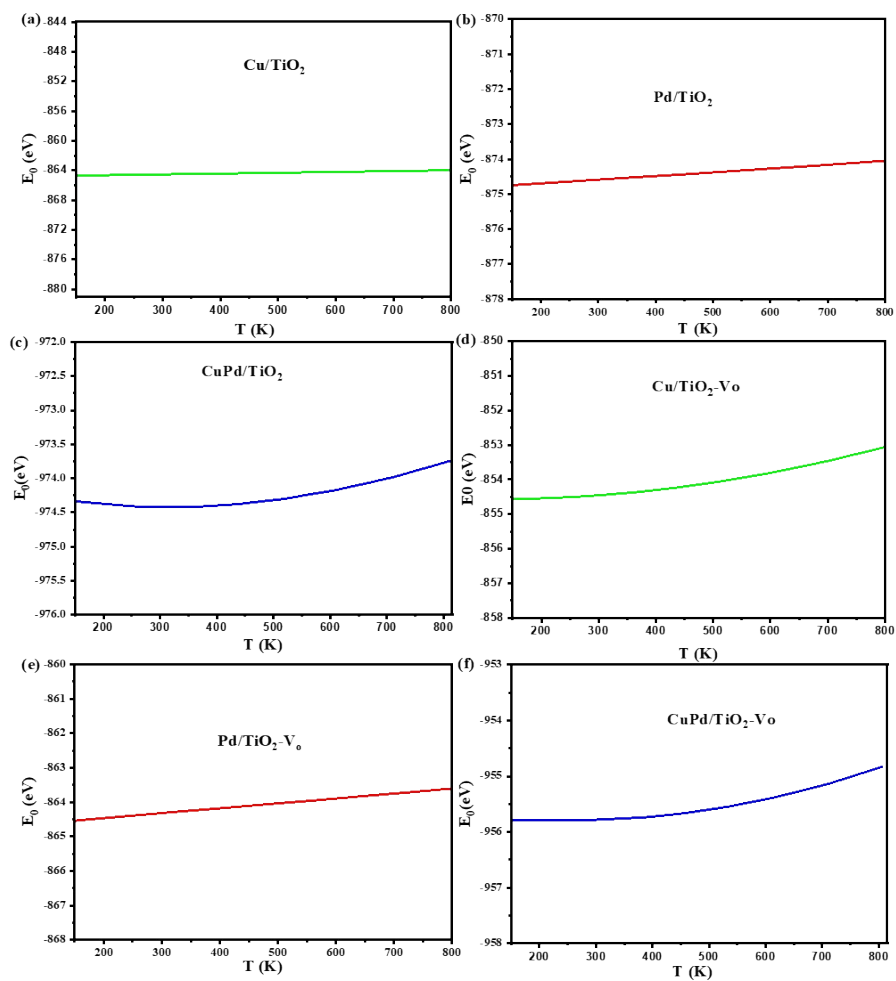

**Fig. S3:** Results of the ab initio molecular dynamics (AIMD) simulation at 1000K showing the variation of the energy and temperature.

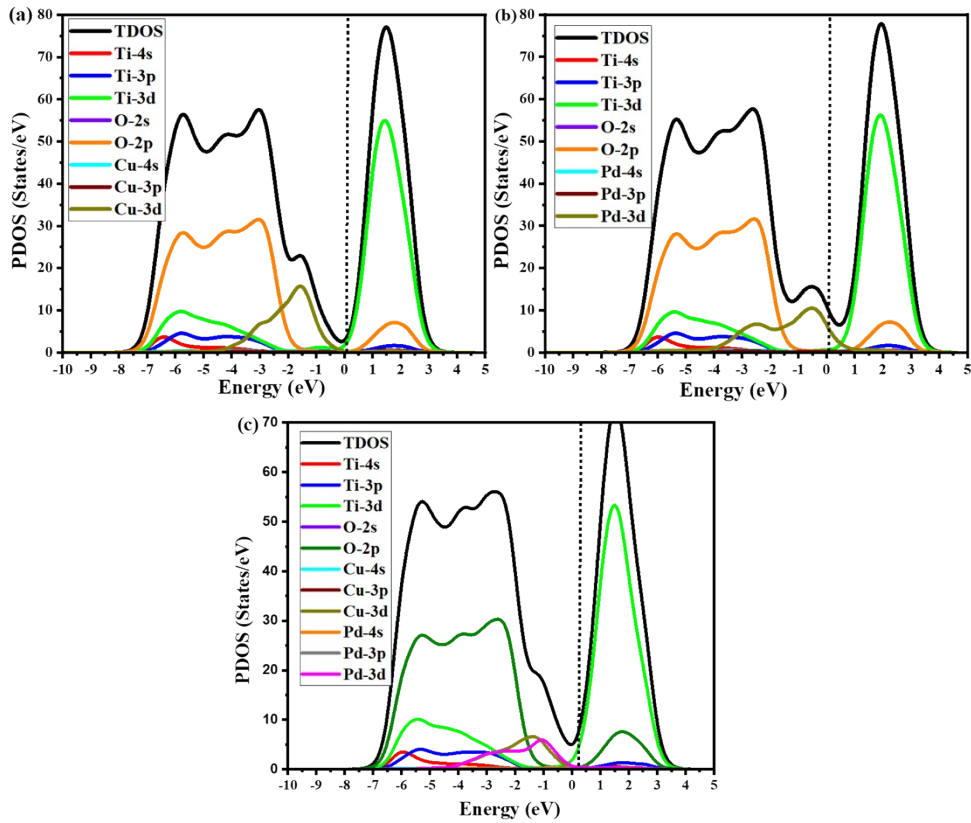

**Fig. S4:** The calculated TDOS and PDOS of (a) Cu/TiO<sub>2</sub>-V<sub>o</sub>, (b) Pd/TiO<sub>2</sub>-V<sub>o</sub> and (c) CuPd/TiO<sub>2</sub>-V<sub>o</sub>.

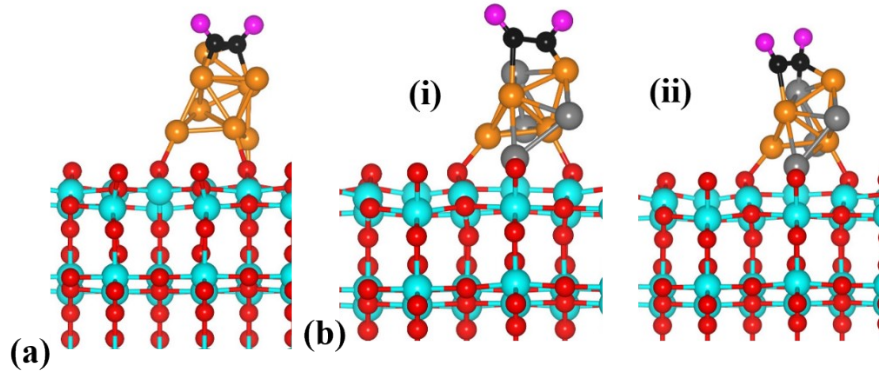

**Fig. S5:** The insertion of CO molecules before the optimization at the (a) Cu-Cu sites of the Cu/TiO<sub>2</sub>-V<sub>o</sub> (b) (i) Cu-Cu, (ii) Cu-Pd sites of the CuPd/TiO<sub>2</sub>-V<sub>o</sub>, where cyan, red, orange and gray represent Ti, O, Cu and Pd, respectively. The pink and black balls represent the O and C atoms of the CO<sub>2</sub> molecules, respectively.

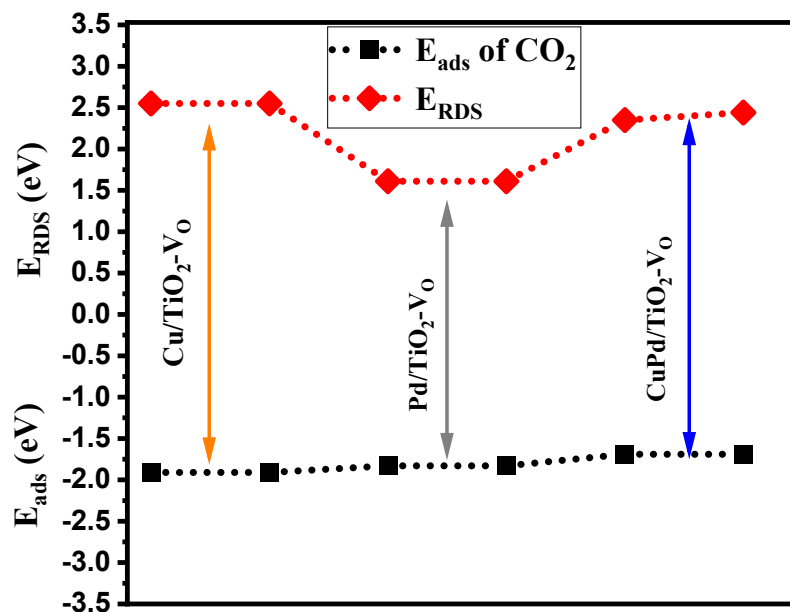

**Fig. S6:** The relation between adsorption energy of CO<sub>2</sub> molecule and energy barrier of the rate-determining step (RDS) during the C-C coupling reaction at the M/TiO<sub>2</sub>-V<sub>o</sub> (M= Cu, Pd, CuPd) interfaces.

**Fig. S7:** The reaction mechanism of C-C coupling on the M/TiO<sub>2</sub> and M/TiO<sub>2</sub>-V<sub>o</sub> (M= Cu, Pd, CuPd) catalysts.

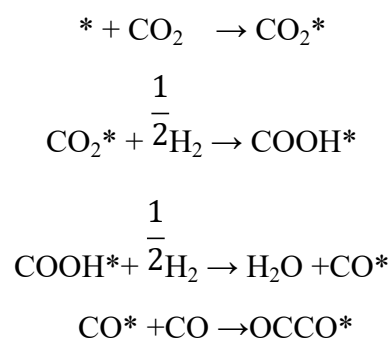

**Fig. S8:** The hydrogenation of OCCO to C<sub>2</sub>H<sub>4</sub> on the M/TiO<sub>2</sub> and M/TiO<sub>2</sub>-V<sub>o</sub> (M= Cu, Pd, CuPd) catalysts.

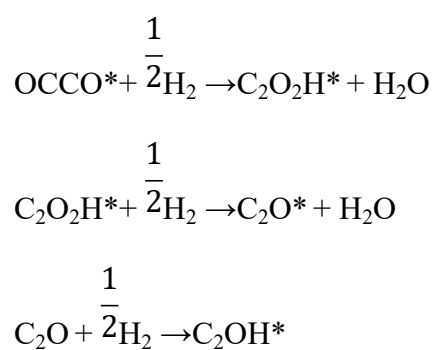



|                                  |       |       |       |       |     |     |     |     |     |     |     |     |
|----------------------------------|-------|-------|-------|-------|-----|-----|-----|-----|-----|-----|-----|-----|
| C <sub>2</sub> OH <sub>2</sub> * | 0.905 | 0.614 | 0.905 | 0.631 | --- | --- | --- | --- | --- | --- | --- | --- |
| C <sub>2</sub> OH <sub>3</sub> * | 1.21  | 0.655 | 1.07  | 0.690 | --- | --- | --- | --- | --- | --- | --- | --- |
| C <sub>2</sub> OH <sub>4</sub> * | 1.53  | 0.73  | 1.42  | 0.697 | --- | --- | --- | --- | --- | --- | --- | --- |
| C <sub>2</sub> H <sub>3</sub> *  | 1.098 | 0.54  | ---   | ---   | --- | --- | --- | --- | --- | --- | --- | --- |
| C <sub>2</sub> H <sub>4</sub> *  | 1.38  | 0.66  | ---   | ---   | --- | --- | --- | --- | --- | --- | --- | --- |

**Table S2:** The calculated Gibbs free energies (G) and energy barriers ( $\Delta G$ ) involved in hydrogenation of OCCO to C<sub>2</sub>H<sub>4</sub>. All energies have been calculated in unit of eV.

| Adsorbate                        | Pd/TiO <sub>2</sub> |             | CuPd/TiO <sub>2</sub> |             | Cu/TiO <sub>2</sub> -V <sub>O</sub> |             | Pd/TiO <sub>2</sub> -V <sub>O</sub> |             | CuPd/TiO <sub>2</sub> -V <sub>O</sub> |             | (Pd) <sub>top</sub> /TiO <sub>2</sub> -V <sub>O</sub> |             |
|----------------------------------|---------------------|-------------|-----------------------|-------------|-------------------------------------|-------------|-------------------------------------|-------------|---------------------------------------|-------------|-------------------------------------------------------|-------------|
|                                  | G                   | $\Delta G$  | G                     | $\Delta G$  | G                                   | $\Delta G$  | G                                   | $\Delta G$  | G                                     | $\Delta G$  | G                                                     | $\Delta G$  |
| CO <sub>2</sub> *                | -1.53               | ---         | -1.14                 | ---         | -1.91                               | ---         | -1.83                               | ---         | -1.69                                 | ---         | -1.22                                                 | ---         |
| CO <sub>2</sub> H*               | 0.82                | <b>2.35</b> | 0.28                  | <b>1.42</b> | 0.64                                | <b>2.55</b> | -0.22                               | <b>1.61</b> | 0.66                                  | <b>2.35</b> | -0.41                                                 | 0.81        |
| CO*                              | -0.93               | ---         | -1.13                 | ---         | 0.68                                | 0.04        | 0.086                               | 0.13        | -0.44                                 | ---         | -0.90                                                 | ---         |
| *COCO                            | -1.23               | ---         | 0.25                  | 1.38        | -1.76                               | ---         | -0.84                               | ---         | -1.45                                 | ---         | 0.35                                                  | <b>1.25</b> |
| *C <sub>2</sub> O <sub>2</sub> H | -0.13               | 1.10        | 0.02                  | ---         | 0.74                                | <b>2.50</b> | 0.34                                | <b>1.18</b> | 0.32                                  | <b>1.77</b> | 0.25                                                  | ---         |
| *C <sub>2</sub> O                | -0.25               | ---         | -0.11                 | ---         | -0.45                               | ---         | -0.19                               | ---         | -0.40                                 | ---         | 0.28                                                  | 0.03        |
| *C <sub>2</sub> OH               | -0.74               | ---         | -1.12                 | ---         | -0.66                               | ---         | -1.44                               | ---         | -0.60                                 | ---         | -1.90                                                 | ---         |
| *C <sub>2</sub> OH <sub>2</sub>  | -0.03               | 0.71        | -0.80                 | 0.32        | -1.28                               | ---         | -1.38                               | 0.06        | -1.16                                 | ---         | -1.54                                                 | 0.36        |
| *C <sub>2</sub> OH <sub>3</sub>  | -1.11               | ---         | -0.50                 | 0.30        | -0.70                               | 0.58        | -0.43                               | 0.95        | -1.20                                 | ---         | 0.01                                                  | <b>1.55</b> |
| *C <sub>2</sub> OH <sub>4</sub>  | 0.33                | <b>1.44</b> | -0.005                | <b>0.49</b> | ---                                 | ---         | ---                                 | ---         | ---                                   | ---         | -0.28                                                 | ---         |
| *C <sub>2</sub> H <sub>3</sub>   | -0.22               | ---         | 0.24                  | 0.24        | ---                                 | ---         | ---                                 | ---         | ---                                   | ---         | 0.304                                                 | 0.58        |
| *C <sub>2</sub> H <sub>4</sub>   | -0.65               | ---         | -0.77                 | ---         | -0.50                               | 0.20        | -1.80                               | ---         | -1.54                                 | ---         | -0.93                                                 | ---         |
